# Supplementary material for: A rapid multiplex real-time PCR detection of toxigenic Clostridioides difficile directly from fecal samples
Source: PubMed Central journal article supplement (PMC9849642; doi:10.1007/s13205-022-03434-6), 2023-01-19
Supplement: 13205_2022_3434_MOESM1_ESM.pdf [file 13205_2022_3434_MOESM1_ESM.pdf]

Table S1. Isolates used and results in evaluating this developed method

| Taxon                                              | Strain                                            | Toxin product type                                | Detection result |             |             |
|----------------------------------------------------|---------------------------------------------------|---------------------------------------------------|------------------|-------------|-------------|
|                                                    |                                                   |                                                   | <i>tcdA</i>      | <i>tcdB</i> | <i>cdtB</i> |
| <i>Escherichia coli</i>                            | ATCC25922                                         | N <sup>a</sup>                                    | -                | -           | -           |
| <i>Enterococcus Faecom</i>                         | ATCCBBA472                                        | N                                                 | -                | -           | -           |
| <i>Enterococcus faecalis</i>                       | ATCC51299                                         | N                                                 | -                | -           | -           |
| <i>Clostridium perfringen</i>                      | ATCC13124                                         | N                                                 | -                | -           | -           |
| <i>Bacteroides fragilis</i>                        | ATCC25285                                         | N                                                 | -                | -           | -           |
| <i>Clostridium botulinum</i><br>(Standard strains) | Clinical isolates                                 | N                                                 | -                | -           | -           |
|                                                    | ATCCBBA1803                                       | <i>A<sup>+</sup>B<sup>+</sup>cdtB<sup>+</sup></i> | +                | +           | +           |
|                                                    | ATCC43594                                         | <i>A<sup>+</sup>B<sup>+</sup>cdtB<sup>-</sup></i> | +                | +           | -           |
|                                                    | ATCC43255                                         | <i>A<sup>+</sup>B<sup>+</sup>cdtB<sup>-</sup></i> | +                | +           | -           |
|                                                    | ATCC43593                                         | <i>A<sup>-</sup>B<sup>-</sup>cdtB<sup>-</sup></i> | -                | -           | -           |
|                                                    | ATCC43603                                         | <i>A<sup>-</sup>B<sup>-</sup>cdtB<sup>-</sup></i> | -                | -           | -           |
|                                                    | ATCC43598                                         | <i>A<sup>-</sup>B<sup>+</sup>cdtB<sup>-</sup></i> | -                | +           | -           |
|                                                    | HL017                                             | <i>A<sup>-</sup>B<sup>+</sup>cdtB<sup>-</sup></i> | -                | +           | -           |
|                                                    | ATCC9689                                          | <i>A<sup>+</sup>B<sup>+</sup>cdtB<sup>-</sup></i> | +                | +           | -           |
|                                                    | 2                                                 | <i>A<sup>-</sup>B<sup>+</sup>cdtB<sup>-</sup></i> | -                | +           | -           |
|                                                    | 4                                                 | <i>A<sup>-</sup>B<sup>+</sup>cdtB<sup>-</sup></i> | -                | +           | -           |
|                                                    | 5                                                 | <i>A<sup>-</sup>B<sup>+</sup>cdtB<sup>-</sup></i> | -                | +           | -           |
|                                                    | 6                                                 | <i>A<sup>-</sup>B<sup>+</sup>cdtB<sup>-</sup></i> | -                | +           | -           |
|                                                    | 7                                                 | <i>A<sup>-</sup>B<sup>+</sup>cdtB<sup>-</sup></i> | -                | +           | -           |
| 16                                                 | <i>A<sup>-</sup>B<sup>+</sup>cdtB<sup>-</sup></i> | -                                                 | +                | -           |             |
| 23                                                 | <i>A<sup>-</sup>B<sup>+</sup>cdtB<sup>-</sup></i> | -                                                 | +                | -           |             |
| 28                                                 | <i>A<sup>-</sup>B<sup>+</sup>cdtB<sup>-</sup></i> | -                                                 | +                | -           |             |
| 29                                                 | <i>A<sup>-</sup>B<sup>+</sup>cdtB<sup>-</sup></i> | -                                                 | +                | -           |             |

|                                            |       |                |   |   |   |
|--------------------------------------------|-------|----------------|---|---|---|
|                                            | 38    | $A^-B^+cdtB^-$ | - | + | - |
|                                            | 50    | $A^-B^+cdtB^-$ | - | + | - |
|                                            | GZ2   | $A^-B^+cdtB^-$ | - | + | - |
|                                            | GZ3   | $A^-B^+cdtB^-$ | - | + | - |
|                                            | GZ6   | $A^-B^+cdtB^-$ | - | + | - |
|                                            | GZ8   | $A^-B^+cdtB^-$ | - | + | - |
|                                            | GZ11  | $A^-B^+cdtB^-$ | - | + | - |
|                                            | GZ12  | $A^-B^+cdtB^-$ | - | + | - |
|                                            | GZ13  | $A^-B^+cdtB^-$ | - | + | - |
|                                            | GZ14  | $A^-B^+cdtB^-$ | - | + | - |
|                                            | HN9   | $A^-B^+cdtB^-$ | - | + | - |
|                                            | ZR8   | $A^-B^+cdtB^-$ | - | + | - |
|                                            | ZR9   | $A^-B^+cdtB^-$ | - | + | - |
|                                            | ZR18  | $A^-B^+cdtB^-$ | - | + | - |
|                                            | ZR29  | $A^-B^+cdtB^-$ | - | + | - |
|                                            | ZR58  | $A^-B^+cdtB^-$ | - | + | - |
|                                            | ZR59  | $A^-B^+cdtB^-$ | - | + | - |
|                                            | ZR65  | $A^-B^+cdtB^-$ | - | + | - |
|                                            | ZR66  | $A^-B^+cdtB^-$ | - | + | - |
|                                            | ZR68  | $A^-B^+cdtB^-$ | - | + | - |
| <i>C.difficile</i><br>(clinical isolates ) | ZR72  | $A^-B^+cdtB^-$ | - | + | - |
|                                            | ZR73  | $A^-B^+cdtB^-$ | - | + | - |
|                                            | ZR82  | $A^-B^+cdtB^-$ | - | + | - |
|                                            | BJ08  | $A^-B^+cdtB^-$ | - | + | - |
|                                            | 11034 | $A^+B^+cdtB^+$ | + | + | + |
|                                            | 12038 | $A^+B^+cdtB^+$ | + | + | + |
|                                            | 10122 | $A^-B^-cdtB^-$ | - | - | - |
|                                            | 10005 | $A^-B^-cdtB^-$ | - | - | - |
|                                            | 11032 | $A^-B^-cdtB^-$ | - | - | - |
|                                            | 25058 | $A^+B^+cdtB^+$ | + | + | + |
|                                            | 25053 | $A^+B^+cdtB^-$ | + | + | - |
|                                            | 10007 | $A^-B^-cdtB^-$ | - | - | - |
|                                            | 01047 | $A^+B^+cdtB^-$ | + | + | - |

|          |                |   |   |   |
|----------|----------------|---|---|---|
| 20086    | $A^-B^-cdtB^-$ | - | - | - |
| 0201-018 | $A^-B^+cdtB^-$ | - | + | - |
| 0201-029 | $A^+B^+cdtB^-$ | + | + | - |
| 0201-041 | $A^-B^+cdtB^-$ | + | + | - |
| 0201-080 | $A^+B^-cdtB^-$ | + | - | - |
| 0203-004 | $A^+B^+cdtB^-$ | + | + | - |
| 0203-006 | $A^-B^+cdtB^-$ | - | + | - |
| 0205-001 | $A^+B^-cdtB^-$ | + | - | - |
| 0205-008 | $A^-B^+cdtB^-$ | - | + | - |
| 0206-003 | $A^+B^+cdtB^-$ | + | + | - |
| 0207-003 | $A^+B^+cdtB^-$ | + | + | - |
| 0207-006 | $A^+B^+cdtB^-$ | + | + | - |
| 0208-002 | $A^-B^-cdtB^-$ | - | - | - |
| 0208-003 | $A^+B^-cdtB^-$ | + | - | - |
| 0201-016 | $A^+B^+cdtB^-$ | + | + | - |
| 0201-021 | $A^+B^-cdtB^-$ | + | - | - |
| 0201-033 | $A^+B^+cdtB^-$ | + | + | - |
| 0201-045 | $A^+B^+cdtB^-$ | + | + | - |
| 0201-059 | $A^+B^+cdtB^-$ | + | + | - |

a.N, not applicable.
