# Supplementary material for: A rapid multiplex real-time PCR detection of toxigenic Clostridioides difficile directly from fecal samples
Source: PubMed Central journal article supplement (PMC9849642; doi:10.1007/s13205-022-03434-6), 2023-01-19
Supplement: 13205_2022_3434_MOESM2_ESM.pdf [file 13205_2022_3434_MOESM2_ESM.pdf]

Table S2. The repeatability of this qPCR method within and between groups

| Target gene | Concentration<br>(copies/ $\mu$ L) | n | variation within groups |       |       | variation between groups |       |       |
|-------------|------------------------------------|---|-------------------------|-------|-------|--------------------------|-------|-------|
|             |                                    |   | $\bar{x}$               | SD    | CV%   | $\bar{x}$                | SD    | CV%   |
| <i>tcdA</i> | $5.53 \times 10^2$                 | 3 | 31.315                  | 0.139 | 0.44% | 31.723                   | 0.576 | 1.80% |
|             | $5.53 \times 10^5$                 | 3 | 21.175                  | 0.041 | 0.09% | 21.578                   | 0.647 | 2.99% |
|             | $5.53 \times 10^7$                 | 3 | 16.093                  | 0.012 | 0.07% | 16.023                   | 0.479 | 2.90% |
| <i>tcdB</i> | $4.03 \times 10^2$                 | 3 | 30.384                  | 0.039 | 0.13% | 33.369                   | 0.476 | 1.42% |
|             | $4.03 \times 10^5$                 | 3 | 22.815                  | 0.058 | 0.25% | 23.225                   | 0.465 | 2.00% |
|             | $4.03 \times 10^7$                 | 3 | 17.079                  | 0.180 | 1.00% | 17.026                   | 0.038 | 0.22% |
| <i>cdtB</i> | $4.28 \times 10^2$                 | 3 | 31.897                  | 0.176 | 0.55% | 32.696                   | 0.743 | 2.27% |
|             | $4.28 \times 10^5$                 | 3 | 22.704                  | 0.131 | 0.57% | 22.685                   | 0.049 | 0.21% |
|             | $4.28 \times 10^7$                 | 3 | 15.144                  | 0.140 | 0.92% | 15.690                   | 0.389 | 2.47% |
