# Supplementary material for: A rapid multiplex real-time PCR detection of toxigenic Clostridioides difficile directly from fecal samples
Source: PubMed Central journal article supplement (PMC9849642; doi:10.1007/s13205-022-03434-6), 2023-01-19
Supplement: 13205_2022_3434_MOESM3_ESM.pdf [file 13205_2022_3434_MOESM3_ESM.pdf]

Table S3. Strains used to evaluate *tcdA* and comparison among three detected methods

| Taxon                                                                    | Strain            | Detection result |      |                 |
|--------------------------------------------------------------------------|-------------------|------------------|------|-----------------|
|                                                                          |                   | <i>tcdA</i>      |      |                 |
|                                                                          |                   | Lemee            | Kato | our <i>tcdA</i> |
| <i>Escherichia coli</i>                                                  | ATCC25922         | -                | -    | -               |
| <i>Enterococcus Faecom</i>                                               | ATCCBBA472        | -                | -    | -               |
| <i>Enterococcus faecalis</i>                                             | ATCC51299         | -                | -    | -               |
| <i>Clostridium perfringen</i>                                            | ATCC13124         | -                | -    | -               |
| <i>Bacteroides fragilis</i>                                              | ATCC25285         | -                | -    | -               |
| <i>Clostridium botulinum</i><br><i>C.difficile</i> (Standard<br>strains) | Clinical isolates | -                | -    | -               |
|                                                                          | ATCCBBA1803       | +                | +    | +               |
|                                                                          | ATCC43594         | +                | +    | +               |
|                                                                          | ATCC43255         | +                | +    | +               |
|                                                                          | ATCC43593         | -                | -    | -               |
|                                                                          | ATCC43603         | -                | -    | -               |
|                                                                          | ATCC43598         | -                | -    | -               |
|                                                                          | HL017             | -                | -    | -               |
|                                                                          | ATCC9689          | +                | +    | +               |
|                                                                          | 2                 | -                | -    | -               |
|                                                                          | 4                 | -                | -    | -               |
|                                                                          | 5                 | -                | -    | -               |
|                                                                          | 6                 | -                | -    | -               |
|                                                                          | 7                 | -                | -    | -               |
|                                                                          | 16                | -                | -    | -               |
| 23                                                                       | -                 | -                | -    |                 |
| 28                                                                       | -                 | -                | -    |                 |
| 29                                                                       | -                 | -                | -    |                 |
| 38                                                                       | -                 | -                | -    |                 |
| 50                                                                       | -                 | -                | -    |                 |
| <i>C.difficile</i><br>(RT017)                                            | GZ2               | -                | -    | -               |
|                                                                          | GZ3               | -                | -    | -               |
|                                                                          | GZ6               | -                | -    | -               |
|                                                                          | GZ8               | -                | -    | -               |
|                                                                          | GZ11              | -                | -    | -               |
|                                                                          | GZ12              | -                | -    | -               |
|                                                                          | GZ13              | -                | -    | -               |
|                                                                          | GZ14              | -                | -    | -               |
|                                                                          | HN9               | -                | -    | -               |
|                                                                          | ZR8               | -                | -    | -               |
|                                                                          | ZR9               | -                | -    | -               |
|                                                                          | ZR18              | -                | -    | -               |
|                                                                          | ZR29              | -                | -    | -               |
|                                                                          | ZR58              | -                | -    | -               |
|                                                                          | ZR59              | -                | -    | -               |

|  |         |   |   |   |
|--|---------|---|---|---|
|  | ZR65    | - | - | - |
|  | ZR66    | - | - | - |
|  | ZR68    | - | - | - |
|  | ZR72    | - | - | - |
|  | ZR73    | - | - | - |
|  | ZR82    | - | - | - |
|  | BJ08    | - | - | - |
|  | XA15    | + | + | + |
|  | Z132    | + | + | + |
|  | YN34    | + | + | + |
|  | YN13    | - | - | - |
|  | N20     | - | + | + |
|  | YN206   | + | + | + |
|  | 18SD148 | - | - | - |
|  | 18SD133 | + | + | + |
|  | 18SD67  | + | + | + |
|  | 18SD62  | + | + | + |
|  | 18SD42  | + | + | + |
|  | 18SD41  | + | + | + |
|  | XA4     | - | - | - |
|  | 18SC199 | + | + | + |
|  | 18SC207 | + | + | + |
|  | XA5     | - | - | - |
|  | 18SC198 | + | + | + |
|  | XA8     | + | + | + |
|  | 18SD140 | + | + | + |
|  | 18SD145 | + | + | + |
|  | 18SD110 | - | - | - |
|  | 18SD178 | + | + | + |
|  | 18SC139 | + | + | + |
|  | 18SC152 | - | - | - |
|  | 18SC135 | + | + | + |
|  | 18SD195 | + | + | + |
|  | 18SD18  | + | + | + |
|  | 18SD36  | - | - | - |
|  | 18SD25  | + | + | + |
|  | 18SC197 | + | + | + |

*C.difficile*  
(Clinical isolates)
